# Supplementary material for: Prevalence and Factors Influencing Use of Internet and Electronic Health Resources by Middle-Aged and Older Adults in a US Health Plan Population: Cross-Sectional Survey Study
Source: PubMed Central journal article supplement (PMC6715345; doi:10.2196/11451), 2019-03-26
Supplement: aging_v2i1e11451_app1.pdf [file aging_v2i1e11451_app1.pdf]

**Multimedia Appendix 1. Sociodemographic factors differentiating middle-aged and older internet-using adults who use the internet by themselves to get information from websites**

|                                      | 45-65 yr                   | 66-75 yr                   | 76-85 yr                   | 45-65 yr                      | 66-75 yr                       | 76-85 yr                      |
|--------------------------------------|----------------------------|----------------------------|----------------------------|-------------------------------|--------------------------------|-------------------------------|
|                                      | Wtd.% (MoE)                | Wtd.% (MoE)                | Wtd.% (MoE)                | AOR (95% CI)                  | AOR (95% CI)                   | AOR (95% CI)                  |
| <b>Age group</b>                     |                            |                            |                            |                               |                                |                               |
| Younger age <sup>a</sup> (ref)       | 96.5% (±0.8)               | 90.8% (±1.5)               | 78.8% (±2.5)               | (ref)                         | (ref)                          | (ref)                         |
| Older age <sup>a</sup>               | 94.8% (±0.9) <sup>b</sup>  | 88.9% (±1.9)               | 73.7% (±5.6)               | 0.55 (0.40-0.76) <sup>c</sup> | 0.93 (0.69-1.25)               | 0.76 (0.54-1.08)              |
| <b>Gender</b>                        |                            |                            |                            |                               |                                |                               |
| Male (ref)                           | 94.9% (±1.0)               | 90.6% (±1.7)               | 77.5% (±3.5)               | (ref)                         | (ref)                          | (ref)                         |
| Female                               | 96.5% (±0.7) <sup>b</sup>  | 89.6% (±1.7)               | 76.2% (±4.0)               | 1.85 (1.34-2.54) <sup>c</sup> | 1.11 (0.82-1.51)               | 1.18 (0.84-1.66)              |
| <b>Race/Ethnicity</b>                |                            |                            |                            |                               |                                |                               |
| White non-Hispanic (ref)             | 97.0% (±0.7)               | 92.4% (±1.3)               | 80.2% (±2.9)               | (ref)                         | (ref)                          | (ref)                         |
| Black                                | 93.7% (±2.7) <sup>b</sup>  | 89.0% (±5.6)               | 61.7% (±13.3) <sup>b</sup> | 0.56 (0.32-0.96) <sup>d</sup> | 0.92 (0.50-1.69)               | 0.46 (0.26-0.82) <sup>b</sup> |
| Hispanic                             | 92.2% (±2.2) <sup>c</sup>  | 85.4% (±5.4) <sup>b</sup>  | 62.9% (±9.6) <sup>c</sup>  | 0.61 (0.40-0.92) <sup>d</sup> | 0.71 (0.42-1.18)               | 0.61 (0.37-1.01)              |
| Filipino                             | 90.2% (±3.9) <sup>d</sup>  | 67.6% (±9.1) <sup>d</sup>  | 34.8% (±14.6) <sup>b</sup> | 0.29 (0.10-0.86) <sup>d</sup> | 0.75 (0.33-1.70)               | 0.07 (0.02-0.30) <sup>c</sup> |
| East Asian                           | 97.3% (±1.4)               | 91.6% (±4.8)               | 83.4% (±9.1)               | 1.17 (0.39-3.54)              | 4.53 (1.74-11.77) <sup>b</sup> | 0.68 (0.16-2.97)              |
| <b>Education</b>                     |                            |                            |                            |                               |                                |                               |
| <High school graduate                | 66.4% (±10.4) <sup>c</sup> | 50.5% (±14.1) <sup>c</sup> | 35.9% (±12.9) <sup>c</sup> | 0.03 (0.01-0.05) <sup>c</sup> | 0.06 (0.03-0.13) <sup>c</sup>  | 0.13 (0.07-0.25) <sup>c</sup> |
| High school graduate                 | 90.1% (±2.2) <sup>c</sup>  | 79.9% (±4.1) <sup>c</sup>  | 68.2% (±6.5) <sup>c</sup>  | 0.10 (0.06-0.17) <sup>c</sup> | 0.20 (0.13-0.32) <sup>c</sup>  | 0.40 (0.25-0.63) <sup>c</sup> |
| Some college/AA degree               | 95.7% (±1.0) <sup>c</sup>  | 90.3% (±2.1) <sup>c</sup>  | 80.8% (±4.0) <sup>c</sup>  | 0.24 (0.15-0.39) <sup>c</sup> | 0.43 (0.28-0.66) <sup>c</sup>  | 0.79 (0.51-1.21)              |
| College graduate (ref)               | 99.2% (±0.3)               | 95.2% (±1.3)               | 83.3% (±3.9)               | (ref)                         | (ref)                          | (ref)                         |
| <b>Household income (US \$)</b>      |                            |                            |                            |                               |                                |                               |
| ≤ \$35,000 (ref)                     | 86.9% (±3.2)               | 82.5% (±3.7)               | 67.8% (±5.8)               | (ref)                         | (ref)                          | (ref)                         |
| \$35,001 - \$50,000                  | 92.5% (±2.5) <sup>c</sup>  | 87.8% (±3.7) <sup>c</sup>  | 79.5% (±6.0) <sup>b</sup>  | 2.01 (1.24-3.27) <sup>b</sup> | 1.18 (0.74-1.88)               | 1.46 (0.89-2.39)              |
| \$50,001 - \$65,000                  | 92.6% (±2.6) <sup>c</sup>  | 92.0% (±3.2) <sup>c</sup>  | 75.5% (±7.9)               | 2.00 (1.21-3.31) <sup>b</sup> | 1.74 (1.02-2.97) <sup>d</sup>  | 1.05 (0.61-1.91)              |
| \$65,001 - \$80,000                  | 96.9% (±1.5) <sup>c</sup>  | 89.4% (±3.3) <sup>c</sup>  | 79.1% (±8.2) <sup>d</sup>  | 3.81 (2.11-6.89) <sup>c</sup> | 1.13 (0.71-1.81)               | 1.13 (0.62-2.04)              |
| \$80,001 - \$100,000                 | 96.8% (±1.5) <sup>c</sup>  | 94.6% (±2.6) <sup>c</sup>  | 85.3% (±6.6) <sup>c</sup>  | 3.35 (1.87-5.99) <sup>c</sup> | 1.93 (1.04-3.61) <sup>d</sup>  | 1.65 (0.88-3.07)              |
| > \$100,000                          | 98.7% (±0.5) <sup>c</sup>  | 95.6% (±1.7) <sup>c</sup>  | 83.4% (±6.5) <sup>b</sup>  | 5.41 (3.21-9.12) <sup>c</sup> | 2.05 (1.17-3.62) <sup>d</sup>  | 1.24 (0.69-2.20)              |
| <b>Model c-statistic<sup>e</sup></b> | --                         | --                         | --                         | c=.83                         | c=.76                          | c=.70                         |

Wtd. % = weighted percentage; MoE = 95% margin of error around estimated percentage (95% confidence intervals can be created from percentage ± MoE); AOR=adjusted odds ratio from logistic regression model that includes age group, gender, race/ethnicity (including other Asian and other race/ethnicity categories), education, and household income; ref = reference group for comparison of variable categories; --: not applicable.

<sup>a</sup> Younger age: 45-55 yr, 66-70 yr, 76-80 yr; Older age: 56-65 yr, 71-75 yr, 81-85 yr

<sup>b</sup> Significantly differs from reference group at p<.01

<sup>c</sup> Significantly differs from reference group at p<.001

<sup>d</sup> Significantly differs from reference group at p<.05

<sup>e</sup> The model c-statistic assesses how well the full logistic regression model predicts who uses the internet by themselves.
