# Supplementary material for: Prevalence and Factors Influencing Use of Internet and Electronic Health Resources by Middle-Aged and Older Adults in a US Health Plan Population: Cross-Sectional Survey Study
Source: PubMed Central journal article supplement (PMC6715345; doi:10.2196/11451), 2019-03-26
Supplement: aging_v2i1e11451_app2.pdf [file aging_v2i1e11451_app2.pdf]

**Multimedia Appendix 2. Comparison of logistic regression models of factors predicting self-reported use of the health plan patient portal during the 12 months prior to the survey, by age group**

|                                             | 45-65 yr                      |                                | 66-75 yr                      |                               | 76-85 yr                      |                               |
|---------------------------------------------|-------------------------------|--------------------------------|-------------------------------|-------------------------------|-------------------------------|-------------------------------|
|                                             | Model 1                       | Model 2                        | Model 1                       | Model 2                       | Model 1                       | Model 2                       |
|                                             | AOR (95% CI)                  | AOR (95% CI)                   | AOR (95% CI)                  | AOR (95% CI)                  | AOR (95% CI)                  | AOR (95% CI)                  |
| <b>Age group</b>                            |                               |                                |                               |                               |                               |                               |
| Younger age <sup>a</sup> (ref)              | (ref)                         | (ref)                          | (ref)                         | (ref)                         | (ref)                         | (ref)                         |
| Older age <sup>a</sup>                      | 1.08 (0.96-1.23)              | 1.19 (1.05-1.36) <sup>b</sup>  | 0.82 (0.68-0.97) <sup>d</sup> | 0.94 (0.78-1.15)              | 0.69 (0.53-0.90) <sup>b</sup> | 0.83 (0.61-1.13)              |
| <b>Gender</b>                               |                               |                                |                               |                               |                               |                               |
| Male (ref)                                  | (ref)                         | (ref)                          | (ref)                         | (ref)                         | (ref)                         | (ref)                         |
| Female                                      | 1.88 (1.66-2.14) <sup>b</sup> | 1.83 (1.61-2.09) <sup>c</sup>  | 1.29 (1.08-1.55) <sup>b</sup> | 1.27 (1.04-1.54) <sup>b</sup> | 1.06 (0.84-1.34)              | 1.17 (0.90-1.53)              |
| <b>Race/Ethnicity</b>                       |                               |                                |                               |                               |                               |                               |
| White non-Hispanic (ref)                    | (ref)                         | (ref)                          | (ref)                         | (ref)                         | (ref)                         | (ref)                         |
| Black                                       | 0.55 (0.44-0.68) <sup>c</sup> | 0.59 (0.47-0.75) <sup>c</sup>  | 0.50 (0.35-0.71) <sup>c</sup> | 0.59 (0.40-0.87) <sup>b</sup> | 0.40 (0.22-0.72) <sup>b</sup> | 0.40 (0.22-0.75) <sup>b</sup> |
| Hispanic                                    | 0.69 (0.57-0.84) <sup>c</sup> | 0.74 (0.60-.0.90) <sup>b</sup> | 0.61 (0.44-0.83) <sup>b</sup> | 0.68 (0.48-0.96) <sup>d</sup> | 0.34 (0.23-0.50) <sup>c</sup> | 0.41 (0.26-0.63) <sup>c</sup> |
| Filipino                                    | 0.77 (0.44-1.22)              | 0.85 (0.53-1.37)               | 0.39 (0.19-0.79) <sup>b</sup> | 0.42 (0.24-1.14)              | 0.61 (0.21-1.79)              | 0.85 (0.25-2.91)              |
| East Asian                                  | 1.17 (0.76-1.82)              | 1.17 (0.76-1.82)               | 1.47 (0.73-2.95)              | 1.49 (0.69-3.21)              | 1.15 (0.42-3.14)              | 1.31 (0.42-4.06)              |
| <b>Education</b>                            |                               |                                |                               |                               |                               |                               |
| <High school graduate                       | 0.28 (0.18-0.43) <sup>c</sup> | 0.48 (0.30-0.76) <sup>b</sup>  | 0.17 (0.10-0.30) <sup>c</sup> | 0.48 (0.24-0.95) <sup>d</sup> | 0.31 (0.18-0.53) <sup>c</sup> | 1.16 (0.62-2.20)              |
| High school graduate                        | 0.57 (0.48-0.69) <sup>c</sup> | 0.70 (0.58-0.85) <sup>c</sup>  | 0.43 (0.33-0.55) <sup>c</sup> | 0.71 (0.53-0.96) <sup>d</sup> | 0.48 (0.34-0.66) <sup>c</sup> | 1.11 (0.77-1.62)              |
| Some college/AA degree                      | 0.74 (0.64-0.86) <sup>c</sup> | 0.77 (0.66-0.90) <sup>c</sup>  | 0.73 (0.59-0.91) <sup>b</sup> | 0.88 (0.70-1.11)              | 0.78 (0.59-1.05) <sup>b</sup> | 1.02 (0.74-1.41)              |
| College graduate (ref)                      | (ref)                         | (ref)                          | (ref)                         | (ref)                         | (ref)                         | (ref)                         |
| <b>Household income (US \$)</b>             |                               |                                |                               |                               |                               |                               |
| ≤ \$35,000 (ref)                            | (ref)                         | (ref)                          | (ref)                         | (ref)                         | (ref)                         | (ref)                         |
| \$35,001 - \$50,000                         | 1.57 (1.21-2.03) <sup>c</sup> | 1.31 (0.99-1.72)               | 1.51 (1.12-2.04) <sup>b</sup> | 1.16 (0.73-1.64)              | 1.87 (1.32-2.66) <sup>c</sup> | 1.33 (0.88-2.02)              |
| \$50,001 - \$65,000                         | 1.91 (1.47-2.49) <sup>c</sup> | 1.42 (1.07-1.88) <sup>d</sup>  | 1.64 (1.19-2.25) <sup>b</sup> | 1.15 (0.81-1.64)              | 2.09 (1.37-3.18) <sup>c</sup> | 1.40 (0.91-2.17)              |
| \$65,001 - \$80,000                         | 1.61 (1.25-2.07) <sup>c</sup> | 1.16 (0.89-1.51)               | 1.66 (1.21-2.27) <sup>b</sup> | 1.16 (0.82-1.64)              | 1.78 (1.17-2.72) <sup>d</sup> | 1.24 (0.73-2.09)              |
| \$80,001 - \$100,000                        | 2.35 (1.84-3.00) <sup>c</sup> | 1.67 (1.29-2.17) <sup>c</sup>  | 1.59 (1.16-2.19) <sup>b</sup> | 1.10 (0.77-1.57) <sup>b</sup> | 1.75 (1.10-2.79) <sup>b</sup> | 1.20 (0.72-2.01)              |
| > \$100,000                                 | 2.16 (1.74-2.66) <sup>c</sup> | 1.54 (1.23-1.93) <sup>c</sup>  | 2.20 (1.63-2.98) <sup>c</sup> | 1.60 (1.47-2.30)              | 2.10 (1.35-3.27) <sup>b</sup> | 1.39 (0.86-2.24)              |
| <b>Uses the internet to get information</b> |                               |                                |                               |                               |                               |                               |
| Does not use                                |                               | 0.03 (0.01-0.06) <sup>c</sup>  |                               | 0.02 (0.01-0.05) <sup>c</sup> |                               | 0.02 (0.01-0.04) <sup>c</sup> |
| Use's with someone's help                   |                               | 0.43 (0.31-0.60) <sup>c</sup>  |                               | 0.35 (0.26-0.48) <sup>c</sup> |                               | 0.40 (0.29-0.56) <sup>c</sup> |
| Uses by self (ref)                          |                               | (ref)                          |                               | (ref)                         |                               | (ref)                         |
| <b>Has access to a computer</b>             |                               |                                |                               |                               |                               |                               |
| No (ref)                                    |                               | (ref)                          |                               | (ref)                         |                               | (ref)                         |
| Yes                                         |                               | 2.33 (1.28-4.24) <sup>b</sup>  |                               | 1.95 (0.97-3.95)              |                               | 1.06 (0.52-2.14)              |
| <b>1 or more chronic conditions</b>         |                               |                                |                               |                               |                               |                               |
| No (ref)                                    | (ref)                         | (ref)                          | (ref)                         | (ref)                         | (ref)                         | (ref)                         |
| Yes                                         | 2.14 (1.87-2.45) <sup>c</sup> | 2.22 (1.94-2.55) <sup>c</sup>  | 1.57 (1.27-1.94) <sup>c</sup> | 1.84 (1.47-2.30) <sup>c</sup> | 1.69 (1.22-2.33) <sup>b</sup> | 1.76 (1.25-2.47) <sup>b</sup> |
| <b>Model c-statistic</b>                    | c=.67                         | c=0.71                         | c=.70                         | c=0.77                        | c=.70                         | c=0.82                        |

---

Model 1 includes sociodemographic factors only; Model 2 adds health and internet access factors; AOR= adjusted odds ratio; CI= 95% confidence interval around AOR; ref = reference group for comparison of variable categories.

<sup>a</sup> Younger age: 45-55 yr, 66-70 yr, 76-80 yr; Older age: 56-65 yr, 71-75 yr, 81-85 yr

<sup>b</sup> Significantly differs from reference group at  $p < .01$

<sup>c</sup> Significantly differs from reference group at  $p < .001$

<sup>d</sup> Significantly differs from reference group at  $p < .05$

<sup>e</sup> The model c-statistic assesses how well the full logistic regression model predicts who reported using the patient portal during the prior year.
